# Supplementary material for: Computational and Synthetic Approach with Biological Evaluation of Substituted Thiazole Derivatives as Small Molecule L858R/T790M/C797S Triple Mutant EGFR Inhibitors Targeting Resistance in Non-Small Cell Lung Cancer (NSCLC)
Source: Research Square preprint supplement (doi:10.21203/rs.3.rs-3957730/v1), 2024-02-19
Supplement: Supplementary file 1 [file dc465a311e2768404f636225.docx]

**Computational and Synthetic Approach with Biological Evaluation of Substituted Thiazole Derivatives as Small Molecule L858R/T790M/C797S Triple Mutant EGFR Inhibitors Targeting Resistance in Non-Small Cell Lung Cancer (NSCLC)**

Sonali S. Shinde1, Aniket P. Sarkate1*, Sanket S. Rathod2, Jaydeo T. Kilbile3, Somdatta Y. Chaudhari4, Shailee V. Tiwari5, Rajesh Yadala6, Smita C. Pawar6, Shashikant V. Bhandari7

1Department of Chemical Technology, Dr. Babasaheb Ambedkar Marathwada University, Chhatrapati Sambhajinagar, 431 004 (MS), India.

2Department of Pharmaceutical Chemistry, Bharati Vidyapeeth College of Pharmacy, Kolhapur, 416 013 (MS), India.

3Department of Chemistry, SBAS, MGM University, Chhatrapati Sambhajinagar -431003, (MS), India.

4Department of Pharmaceutical Chemistry, PES's Modern College of Pharmacy, Yamunanagar, Nigdi, Pune, 411 044 (MS), India.

**5**Department of Pharmaceutical Chemistry, Shri Ramkrishna Paramhans College of Pharmacy, Hasnapur, Parbhani-431401, Maharashtra, India.

**6**Department of Genetics and Biotechnology Osmania University, Hyderabad-500007, Telangana, India

**7**Department of Pharmaceutical Chemistry, AISSMS College of Pharmacy, Near RTO, Kennedy Road, Pune-411001, Maharashtra, India

***Corresponding author**

Dr. Aniket P. Sarkate

E-mail: [apssonali21@gmail.com](mailto:apssonali21@gmail.com)

**Email ID of all authors:**

Sonali Shinde [shindesonali5645@gmail.com](mailto:shindesonali5645@gmail.com)

Aniket Sarkate [apssonali21@gmail.com](mailto:apssonali21@gmail.com)

Sanket Rathod ssrathod7588@gmail.com

Jaydeo T. Kilbile
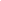
kilbilej@gmail.com

Somdatta Chaudhari [somuchaudhari@gmail.com](mailto:somuchaudhari@gmail.com)

Shailee V. Tiwari [shailee2010@gmail.com](mailto:shailee2010@gmail.com)

Rajesh Yadala rajeshyadala14@gmail.com

Smita C. Pawar [Smita.prof@gmail.com](mailto:Smita.prof@gmail.com)

Shashikant V. Bhandari sh

- [ashikantbhandari2011@gmail.com](mailto:ashikantbhandari2011@gmail.com)

| **Compound 4a** (1H NMR, DMSO-*d6*, 500 MHz) | |
| --- | --- |
| 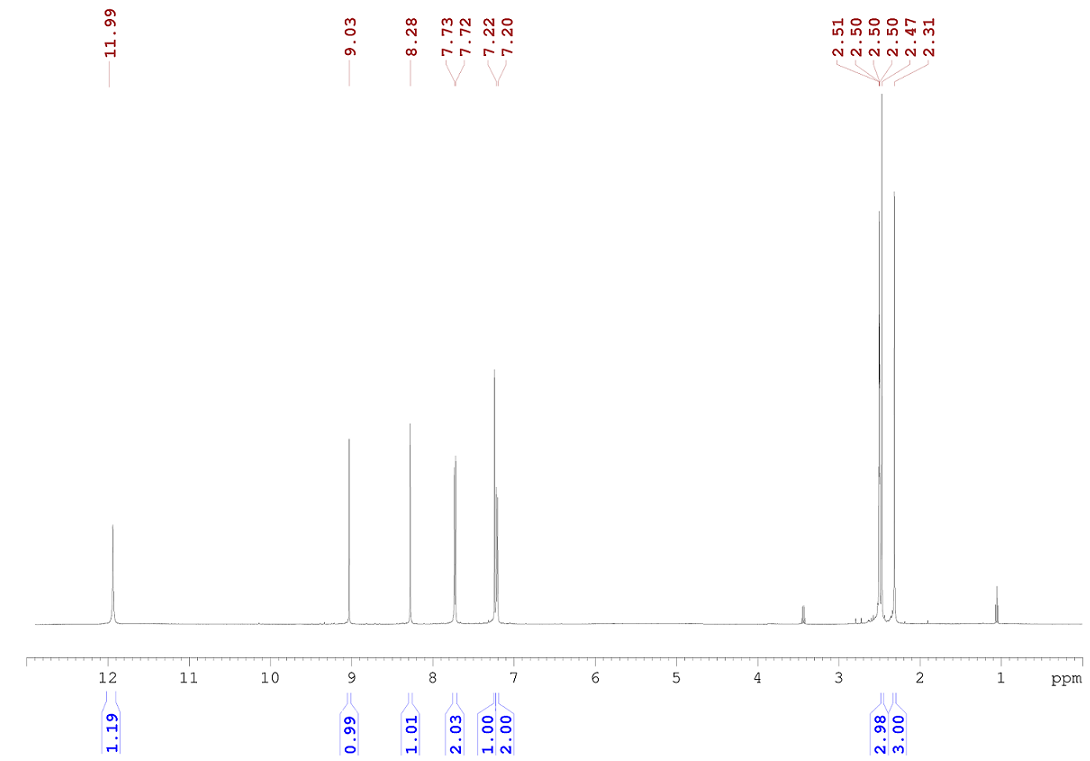 | |
| **Compound 4a (13C NMR, DMSO-*d6*, 125 MHz)** | |
| 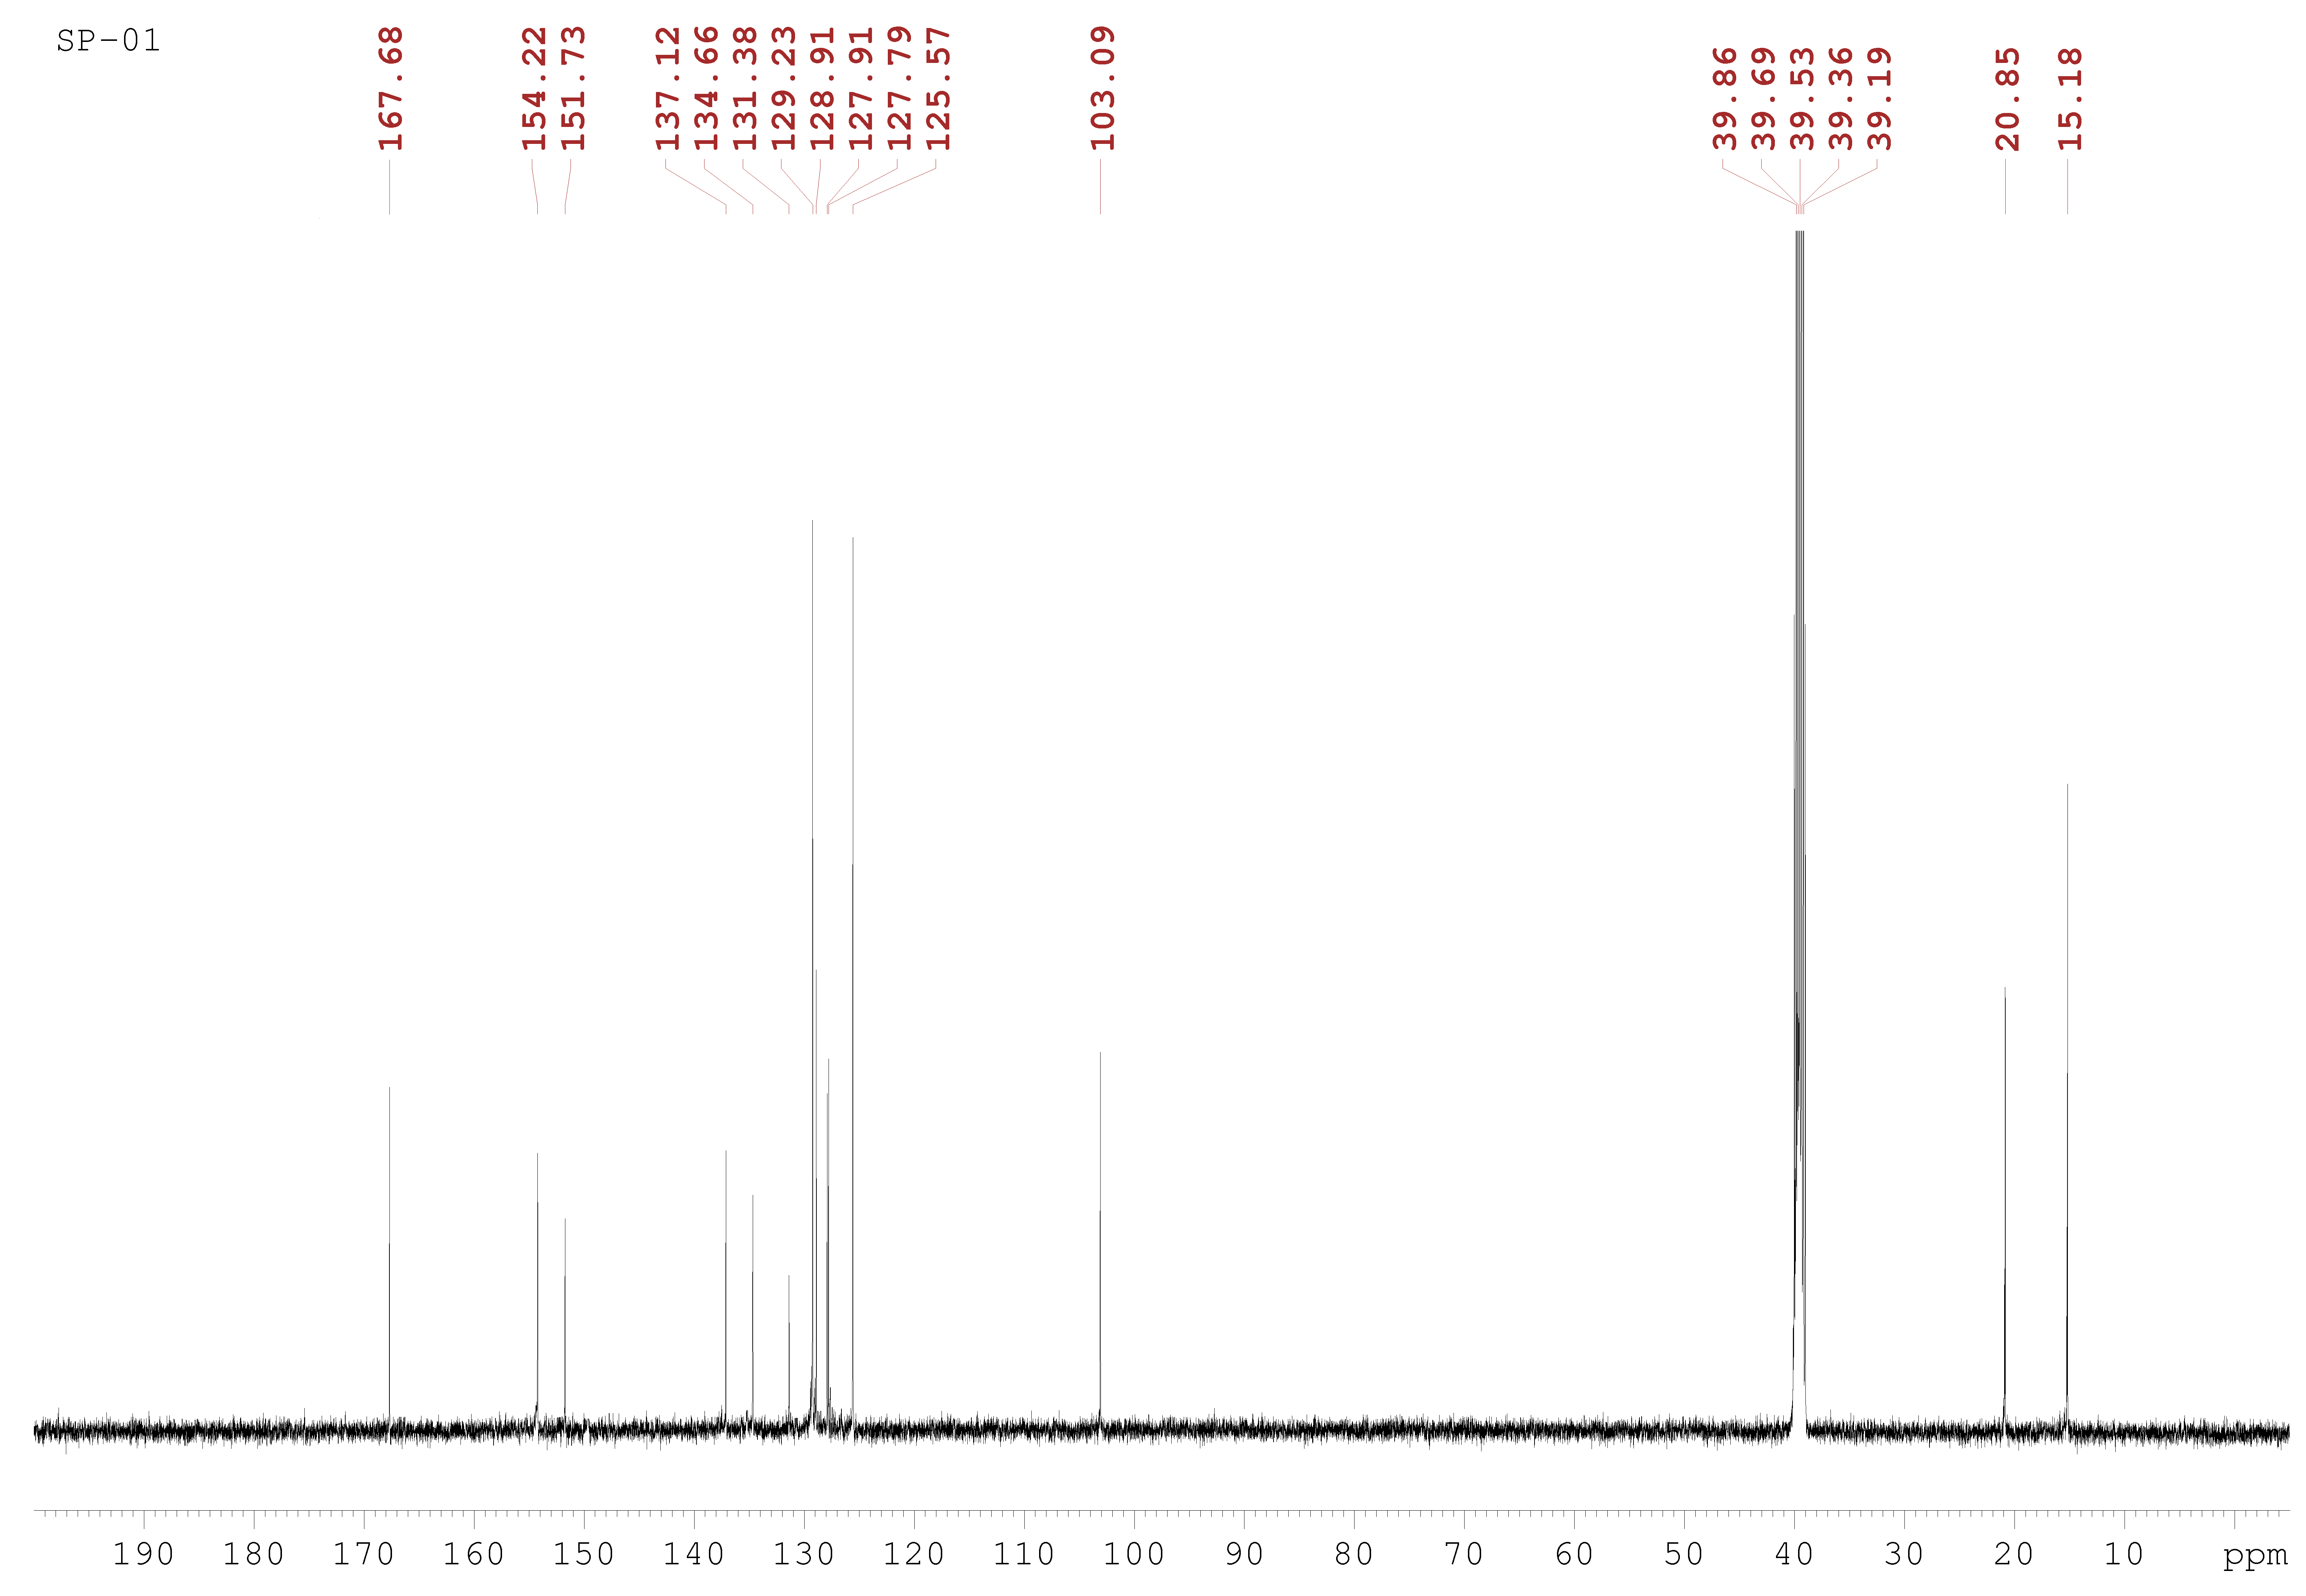 | |
| **Compound 4a** (IR) |
|  |

| **Compound 4a** Compound 4a(HRMS) |
| --- |
| 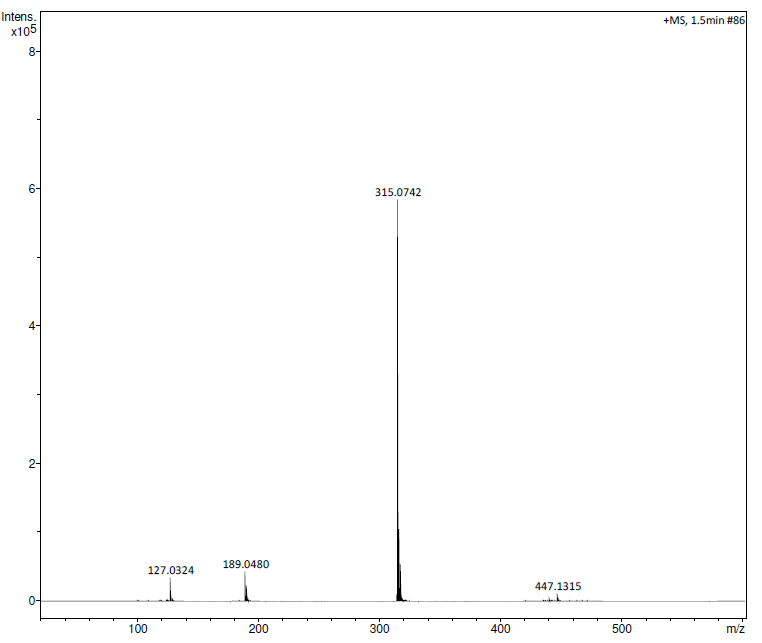 |

| **Compound 4b** (1H NMR, DMSO-*d6*, 500 MHz) |
| --- |
|  |

| **Compound 4b** (13C NMR, DMSO-*d6*, 125 MHz) |
| --- |
| 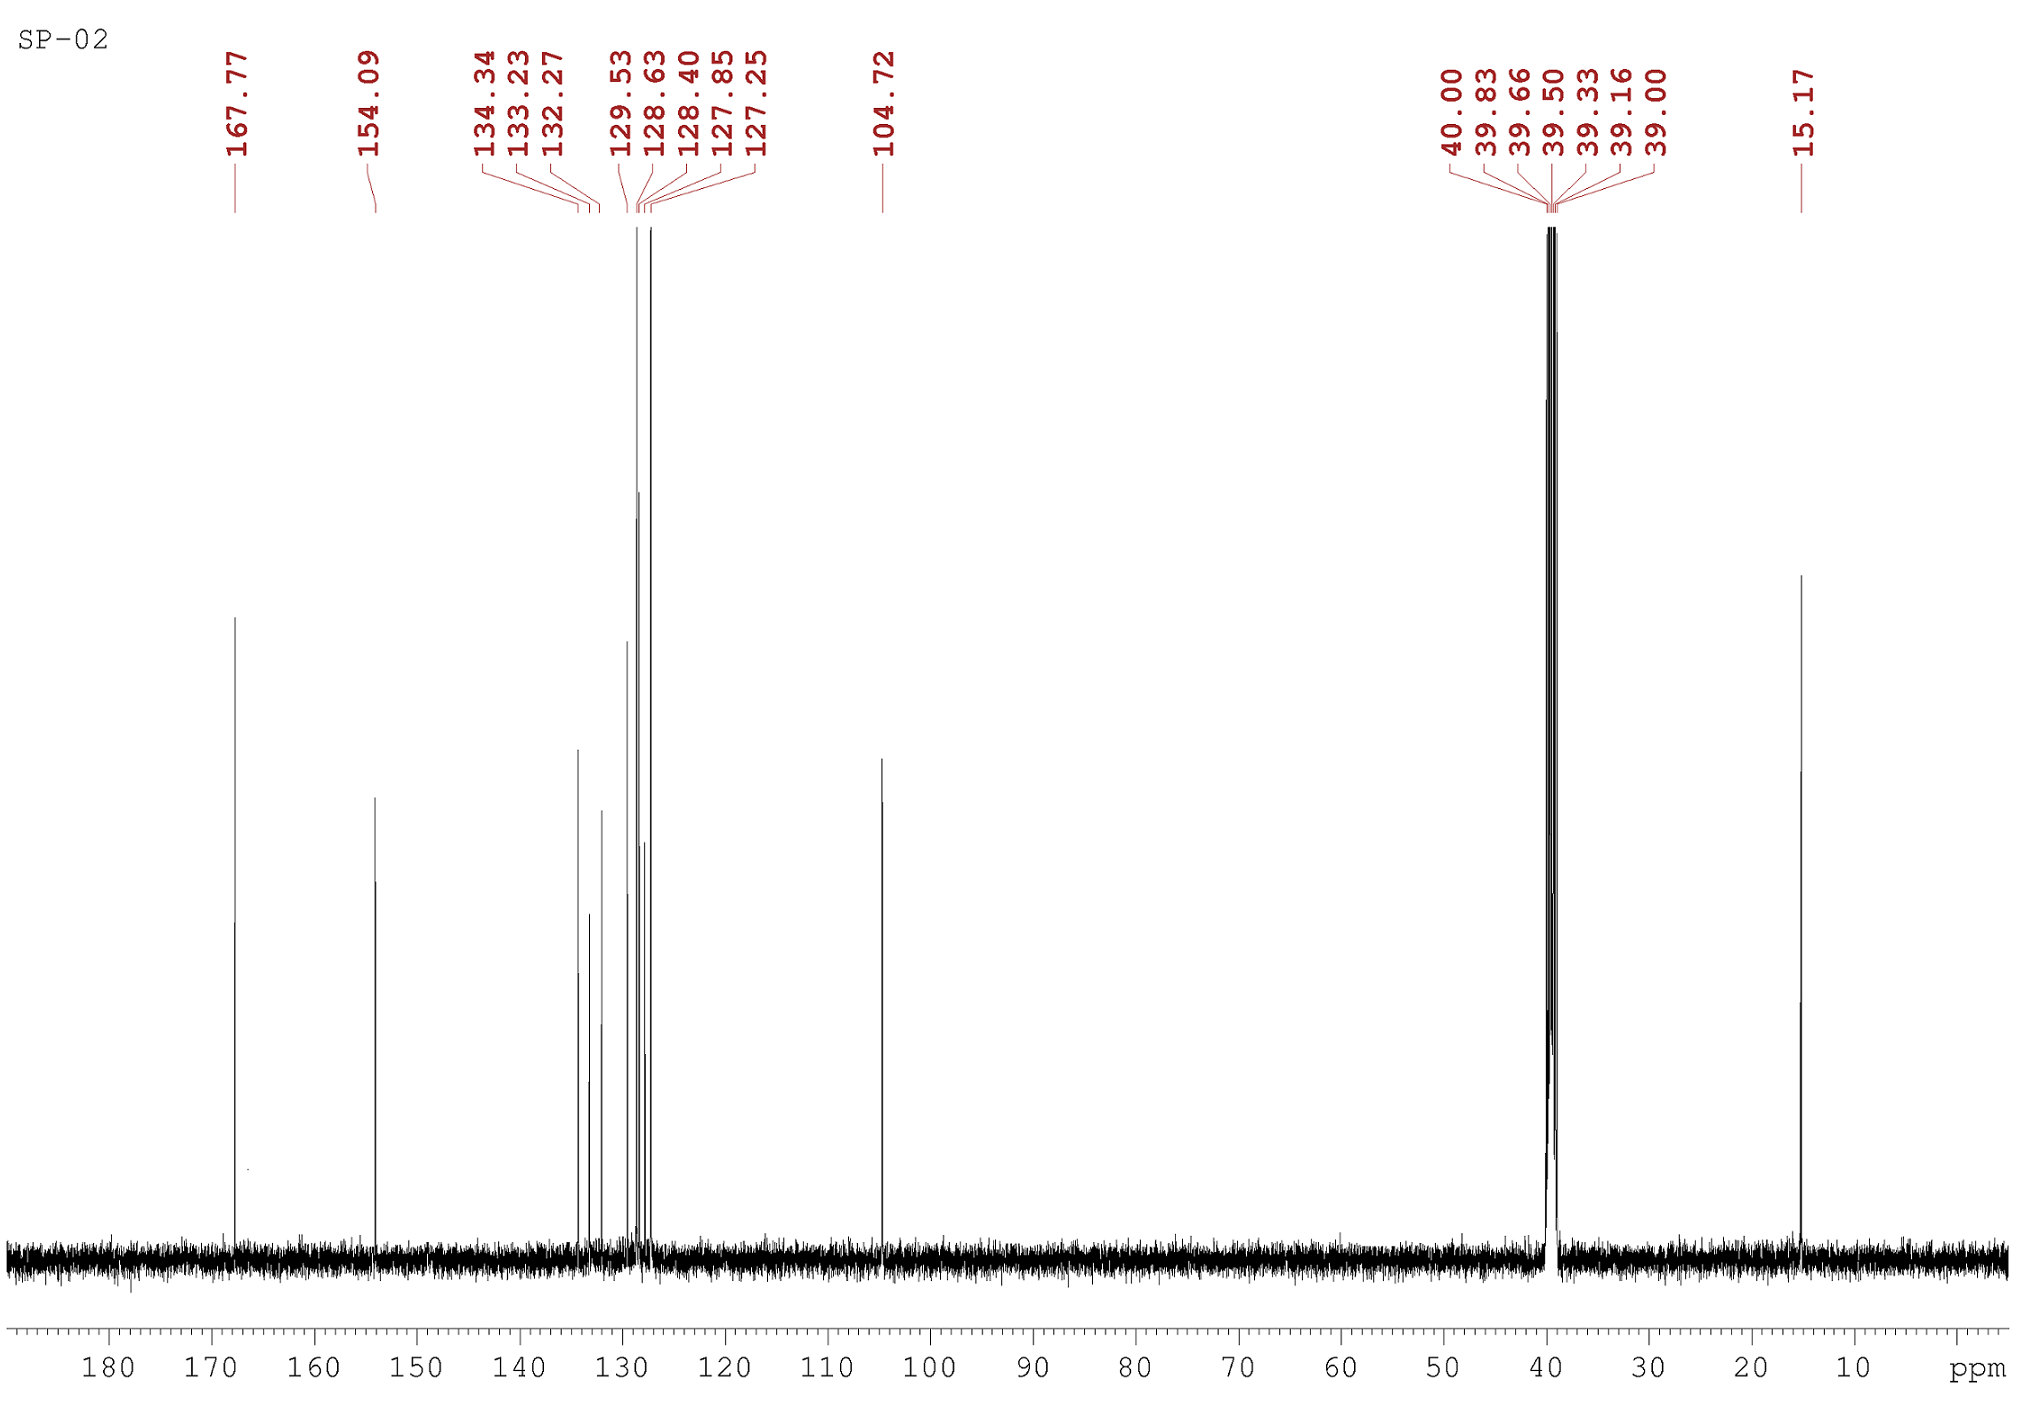 |

| **Compound 4b** (IR) |
| --- |
|  |

| **Compound 4b** (HRMS) |
| --- |
| 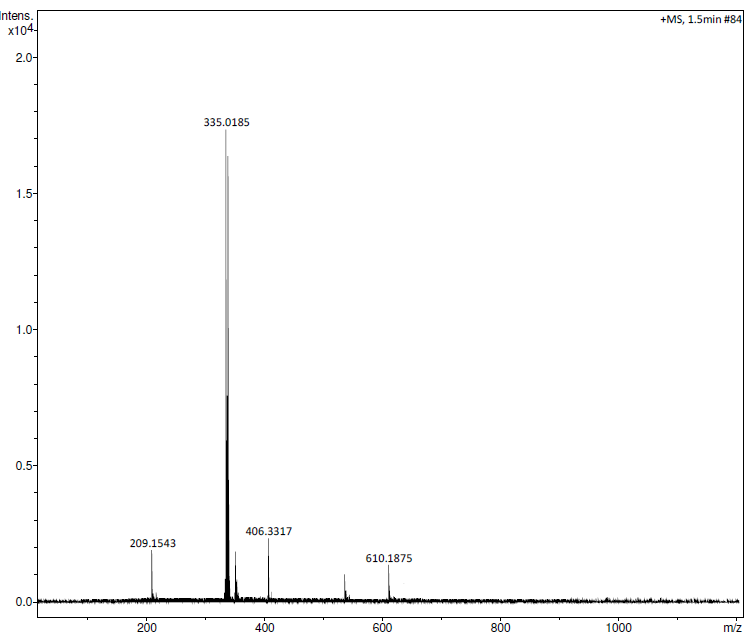 |

| **Compound 4c** (1H NMR, DMSO-*d6*, 500 MHz) |
| --- |
|  |

| **Compound 4c** (13C NMR, DMSO-*d6*, 125 MHz) |
| --- |
| 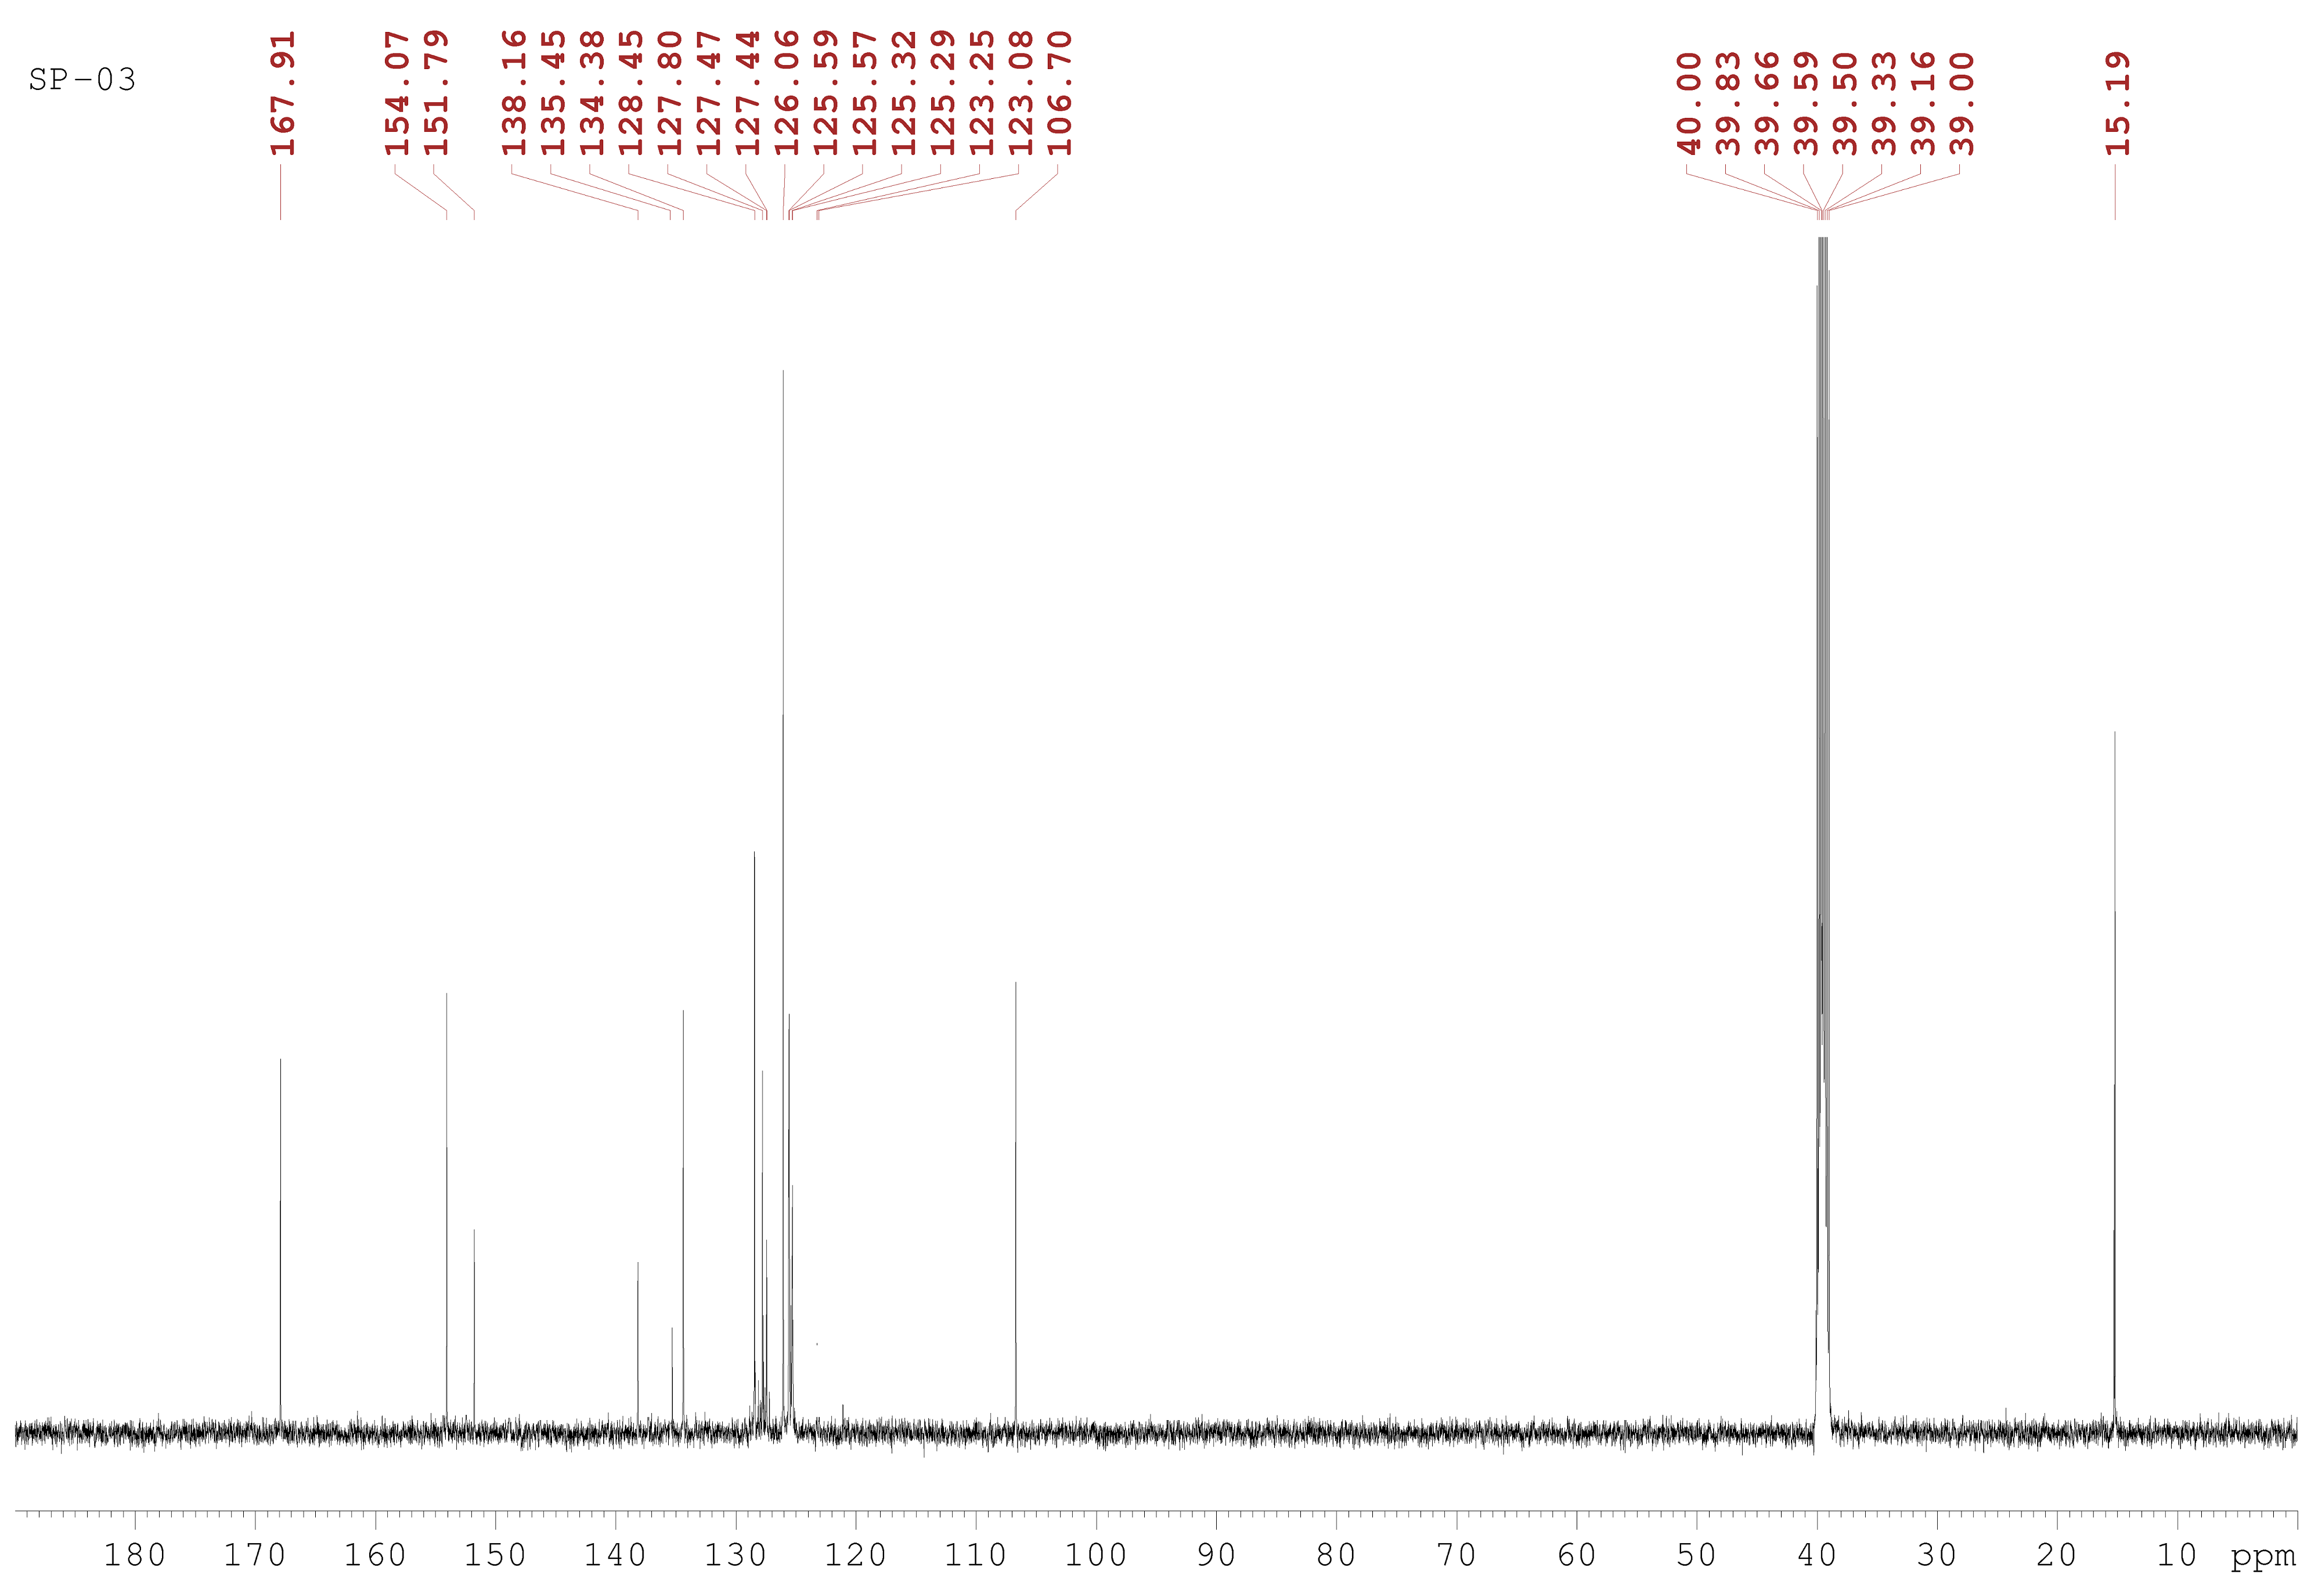 |

| **Compound 4c** (IR) |
| --- |
|  |

| **Compound 4c** (HRMS) |
| --- |
| 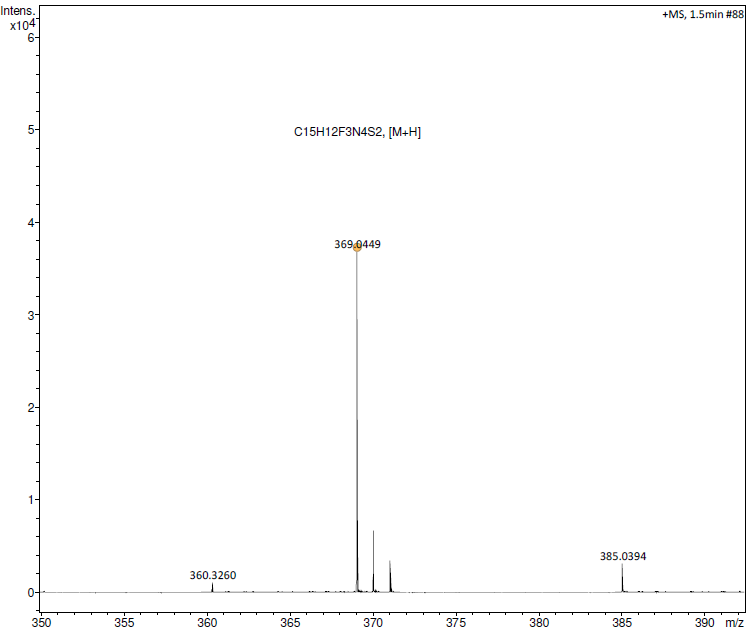 |

| **Compound 4d** (1H NMR, DMSO-*d6*, 500 MHz) |
| --- |
|  |

| **Compound 4d** (13C NMR, DMSO-*d6*, 125 MHz) |
| --- |
| 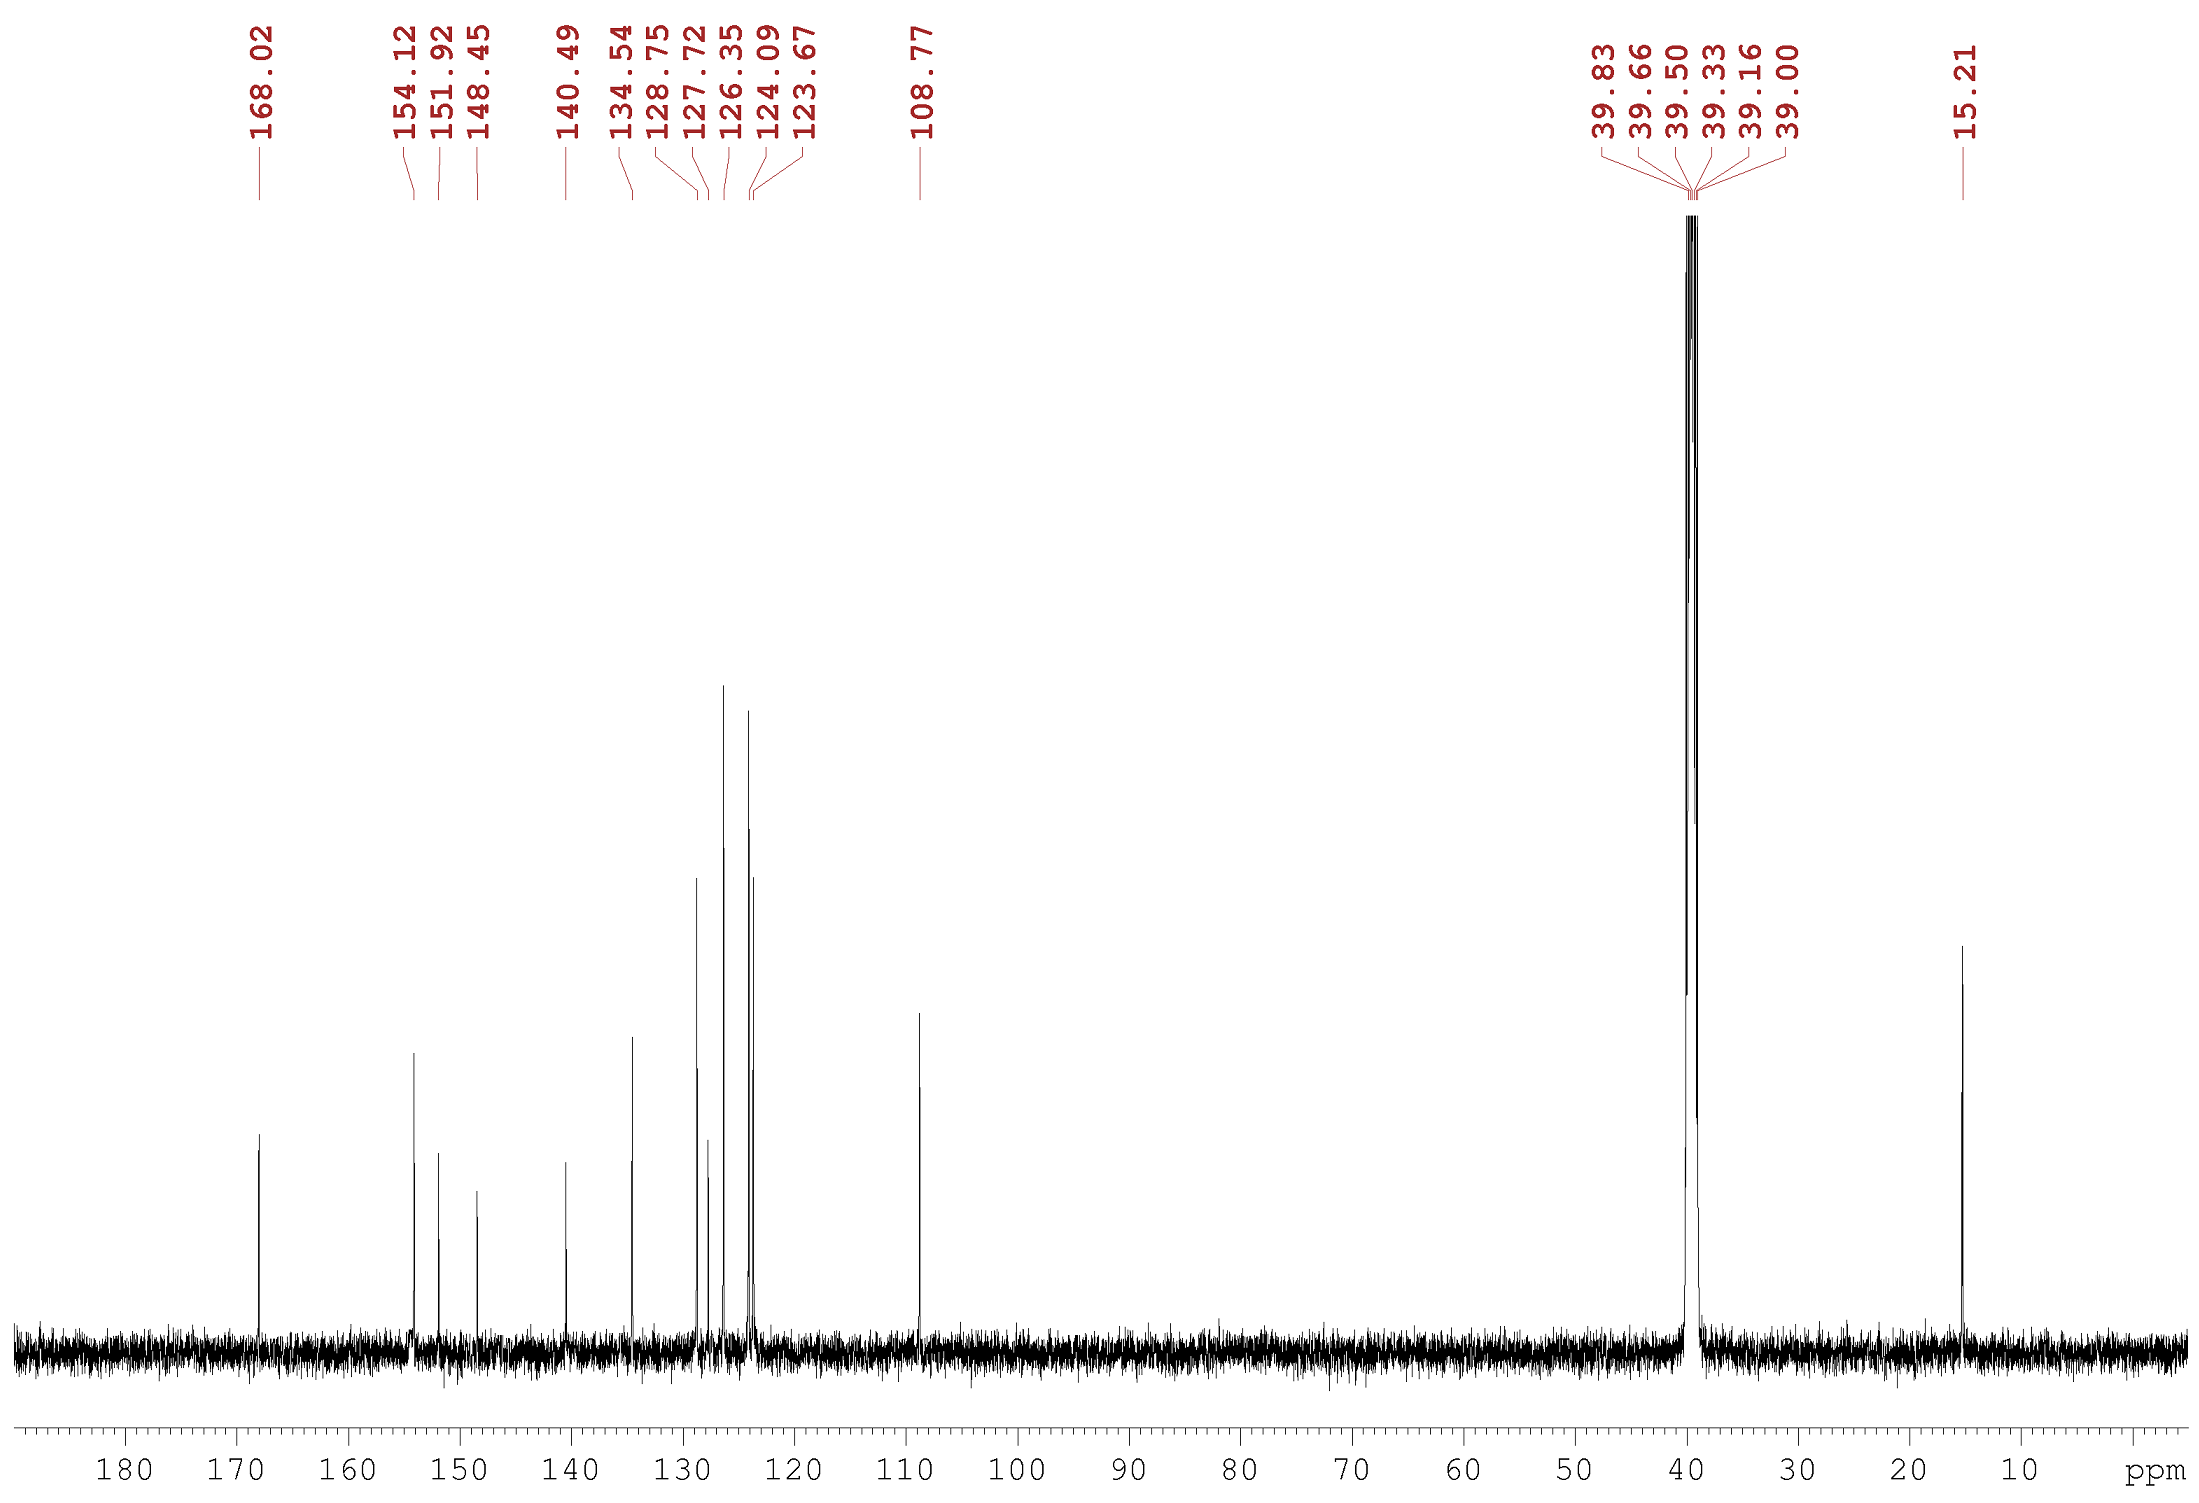 |

| **Compound 4d** (IR) |
| --- |
|  |

| **Compound 4d** (HRMS) |
| --- |
| 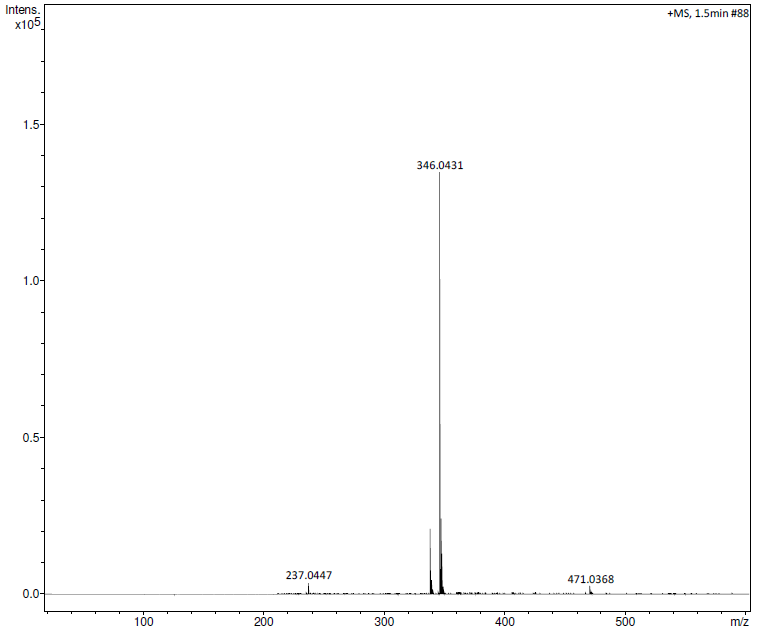 |
| **Compound 4e** (1H NMR, DMSO-*d6*, 500 MHz) |
|  |

| **Compound 4e** (13C NMR, DMSO-*d6*, 125 MHz) |
| --- |
| 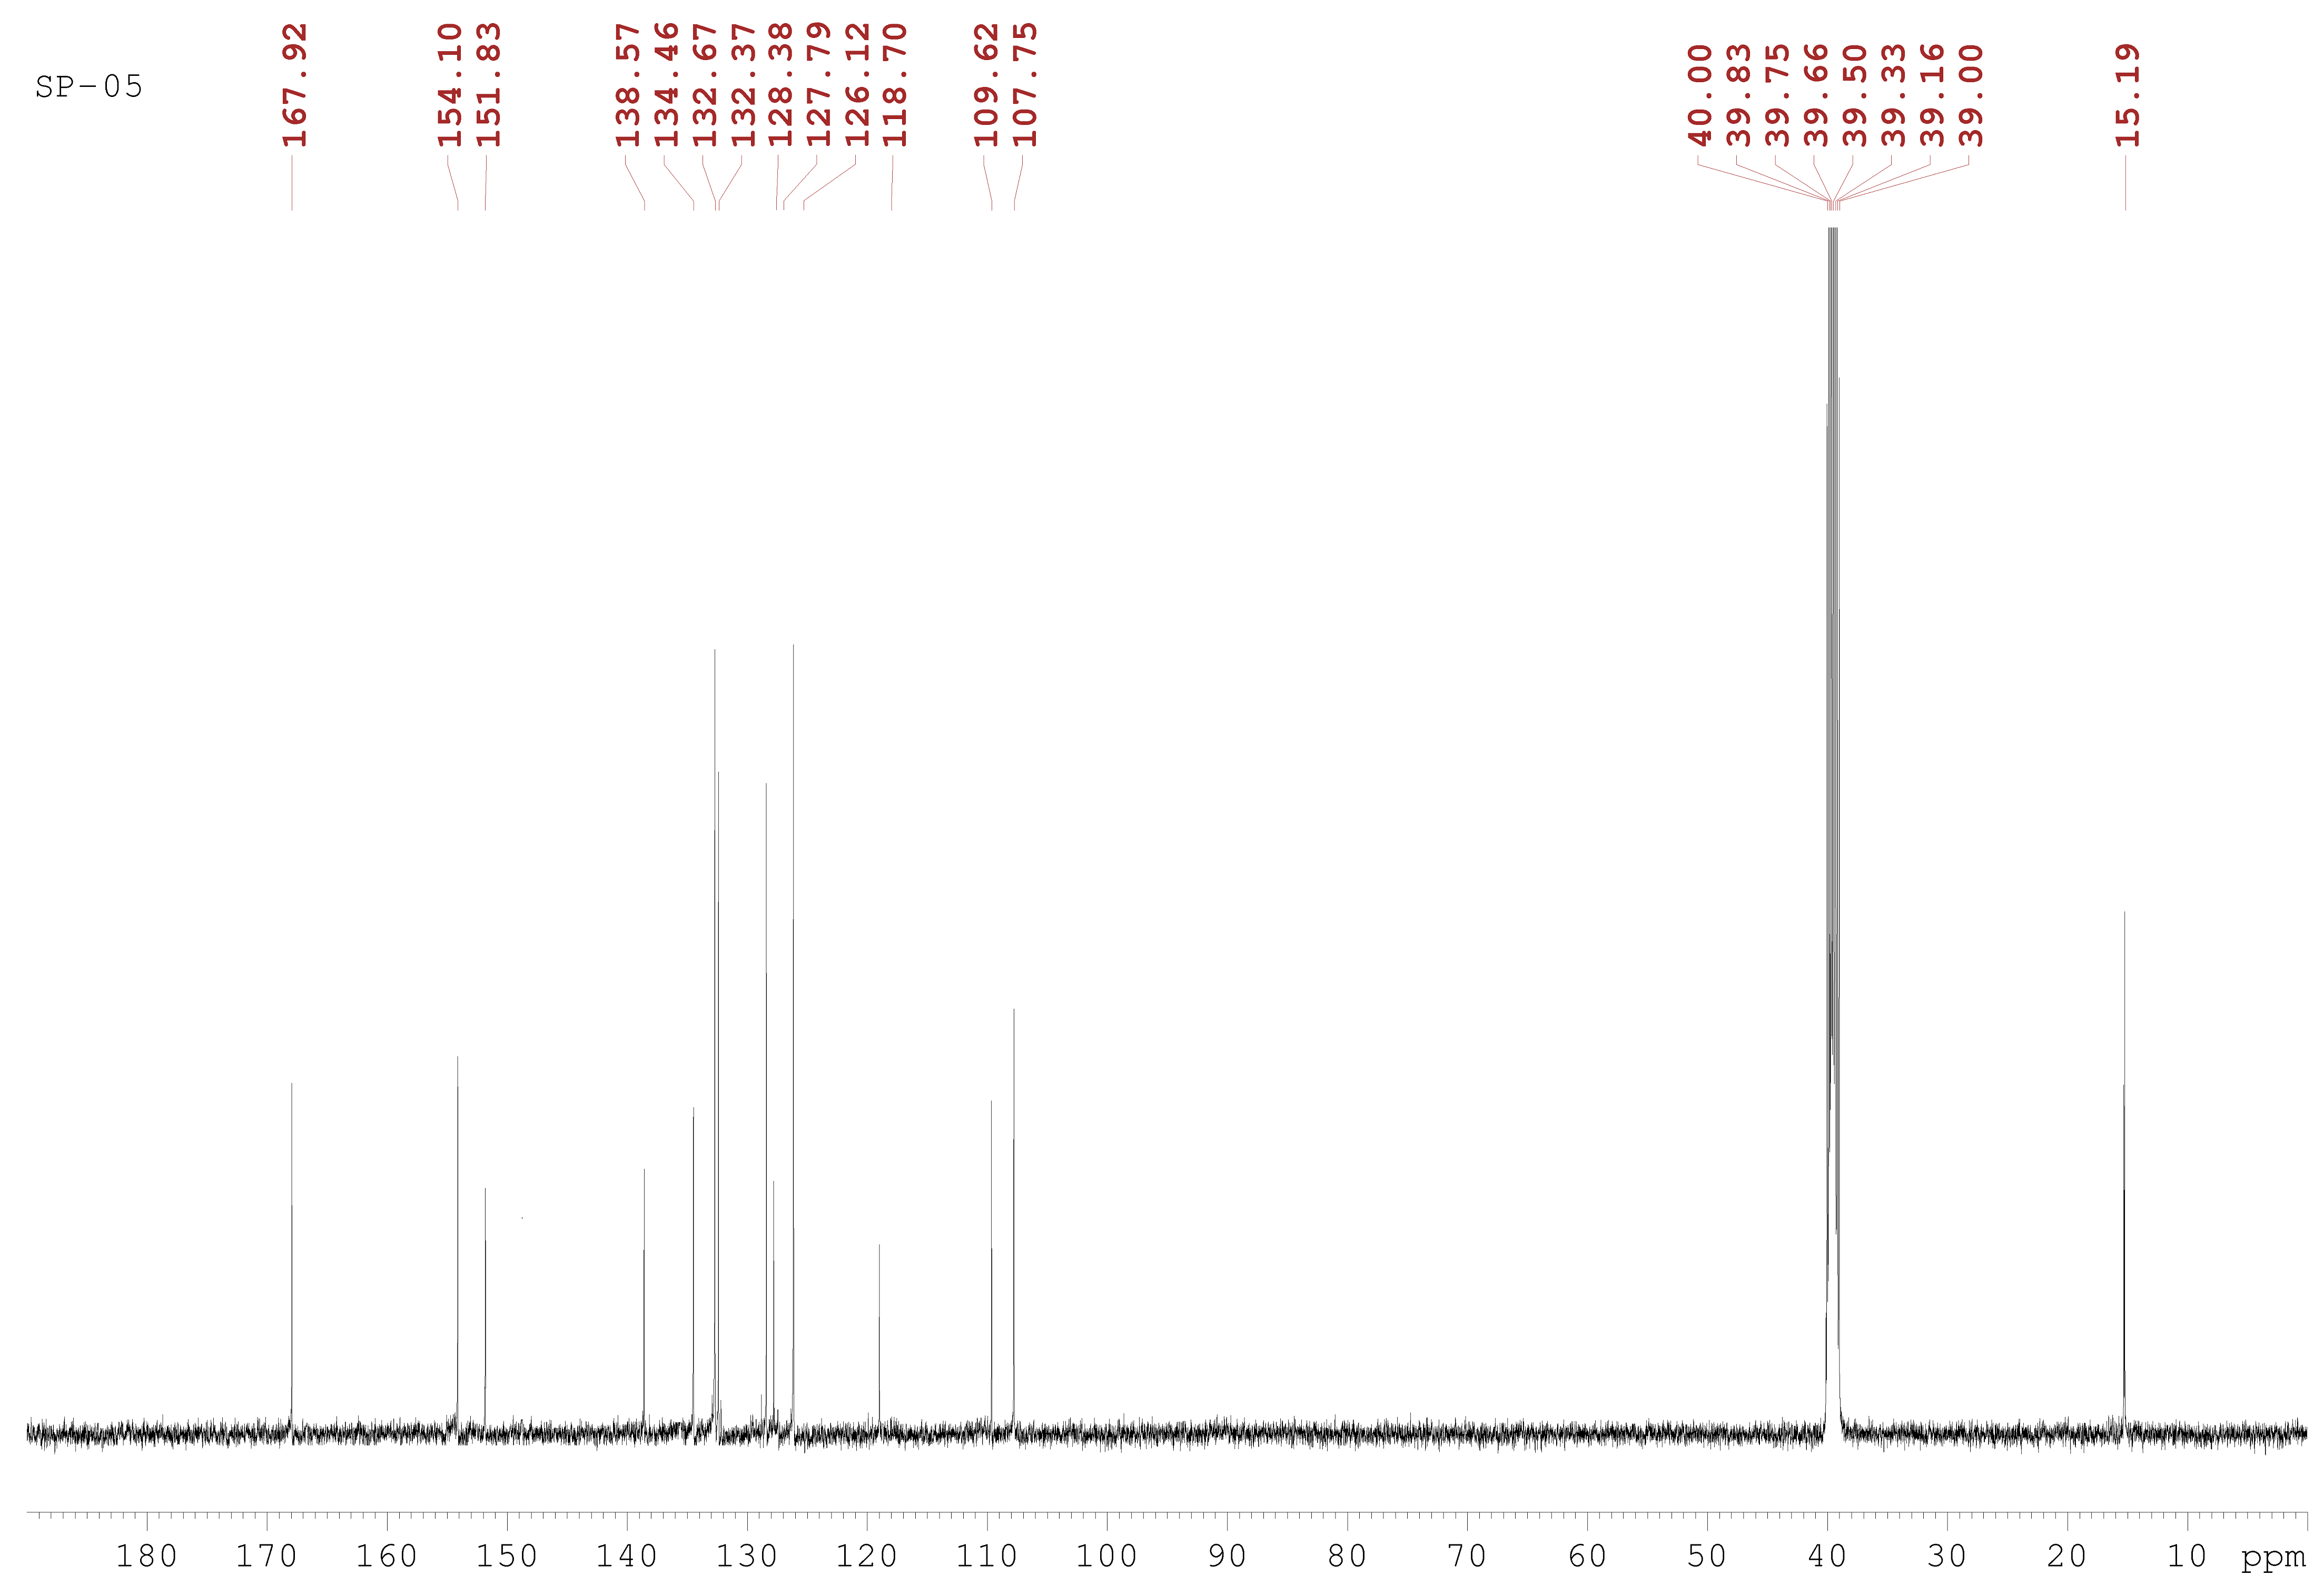 |

| **Compound 4e** (IR) |
| --- |
|  |

| **Compound 4e** (HRMS) |
| --- |
| 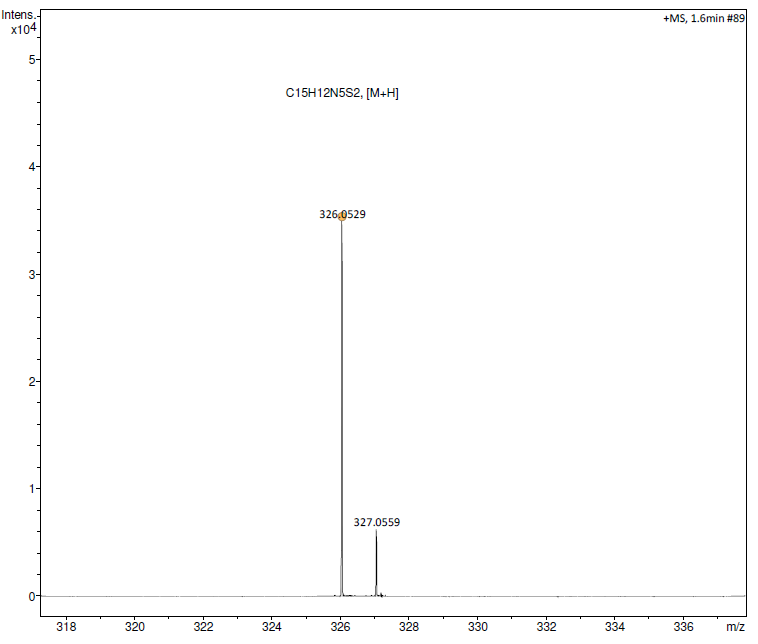 |
| **Compound 4f** (1H NMR, DMSO-*d6*, 500 MHz) |
|  |

| **Compound 4f** (13C NMR, DMSO-*d6*, 125 MHz) |
| --- |
| 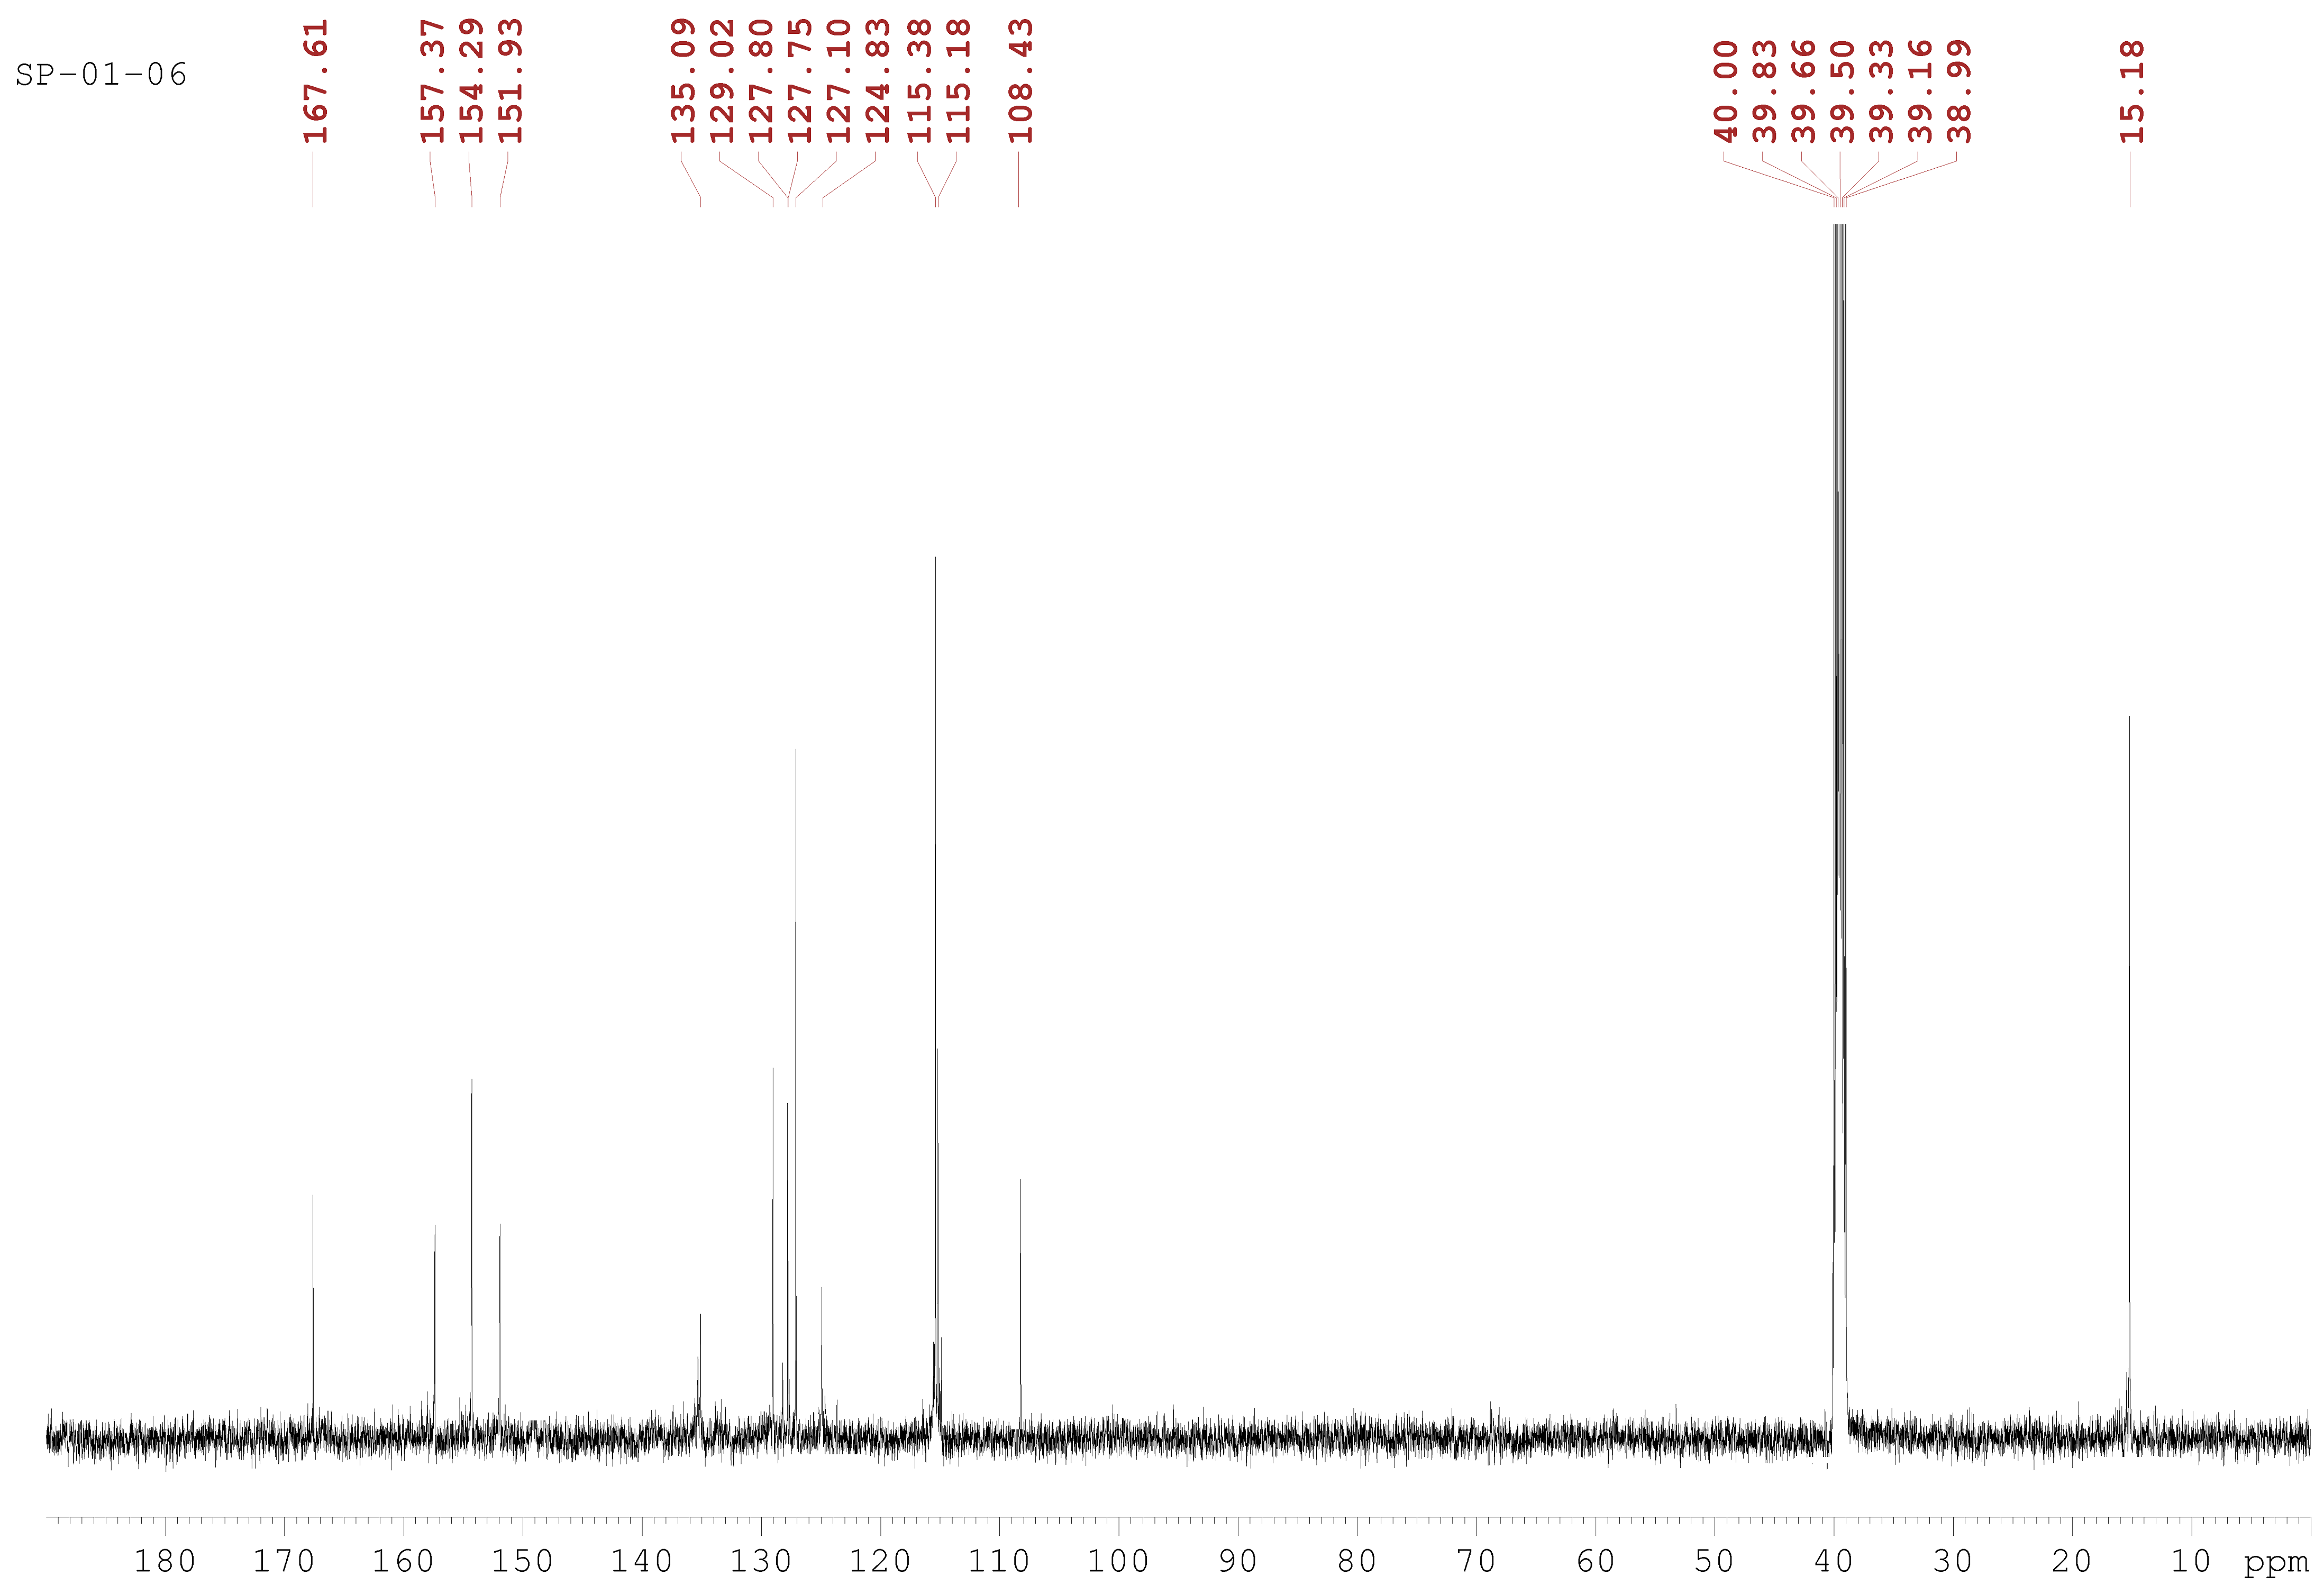 |

| **Compound 4f** (IR) |
| --- |
|  |

| **Compound 4f** (HRMS) |
| --- |
| 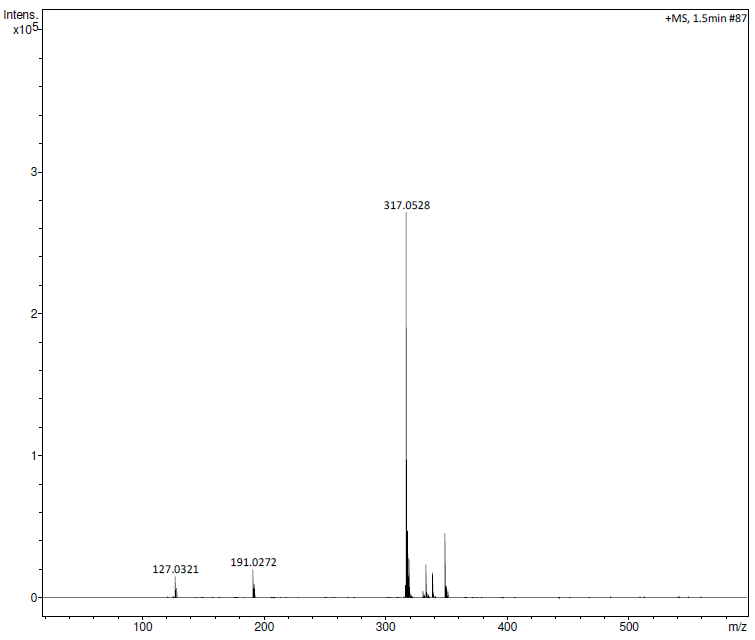 |
| **Compound 4g** (1H NMR, DMSO-*d6*, 500 MHz) |
|  |

| **Compound 4g** (13C NMR, DMSO-*d6*, 125 MHz) |
| --- |
| 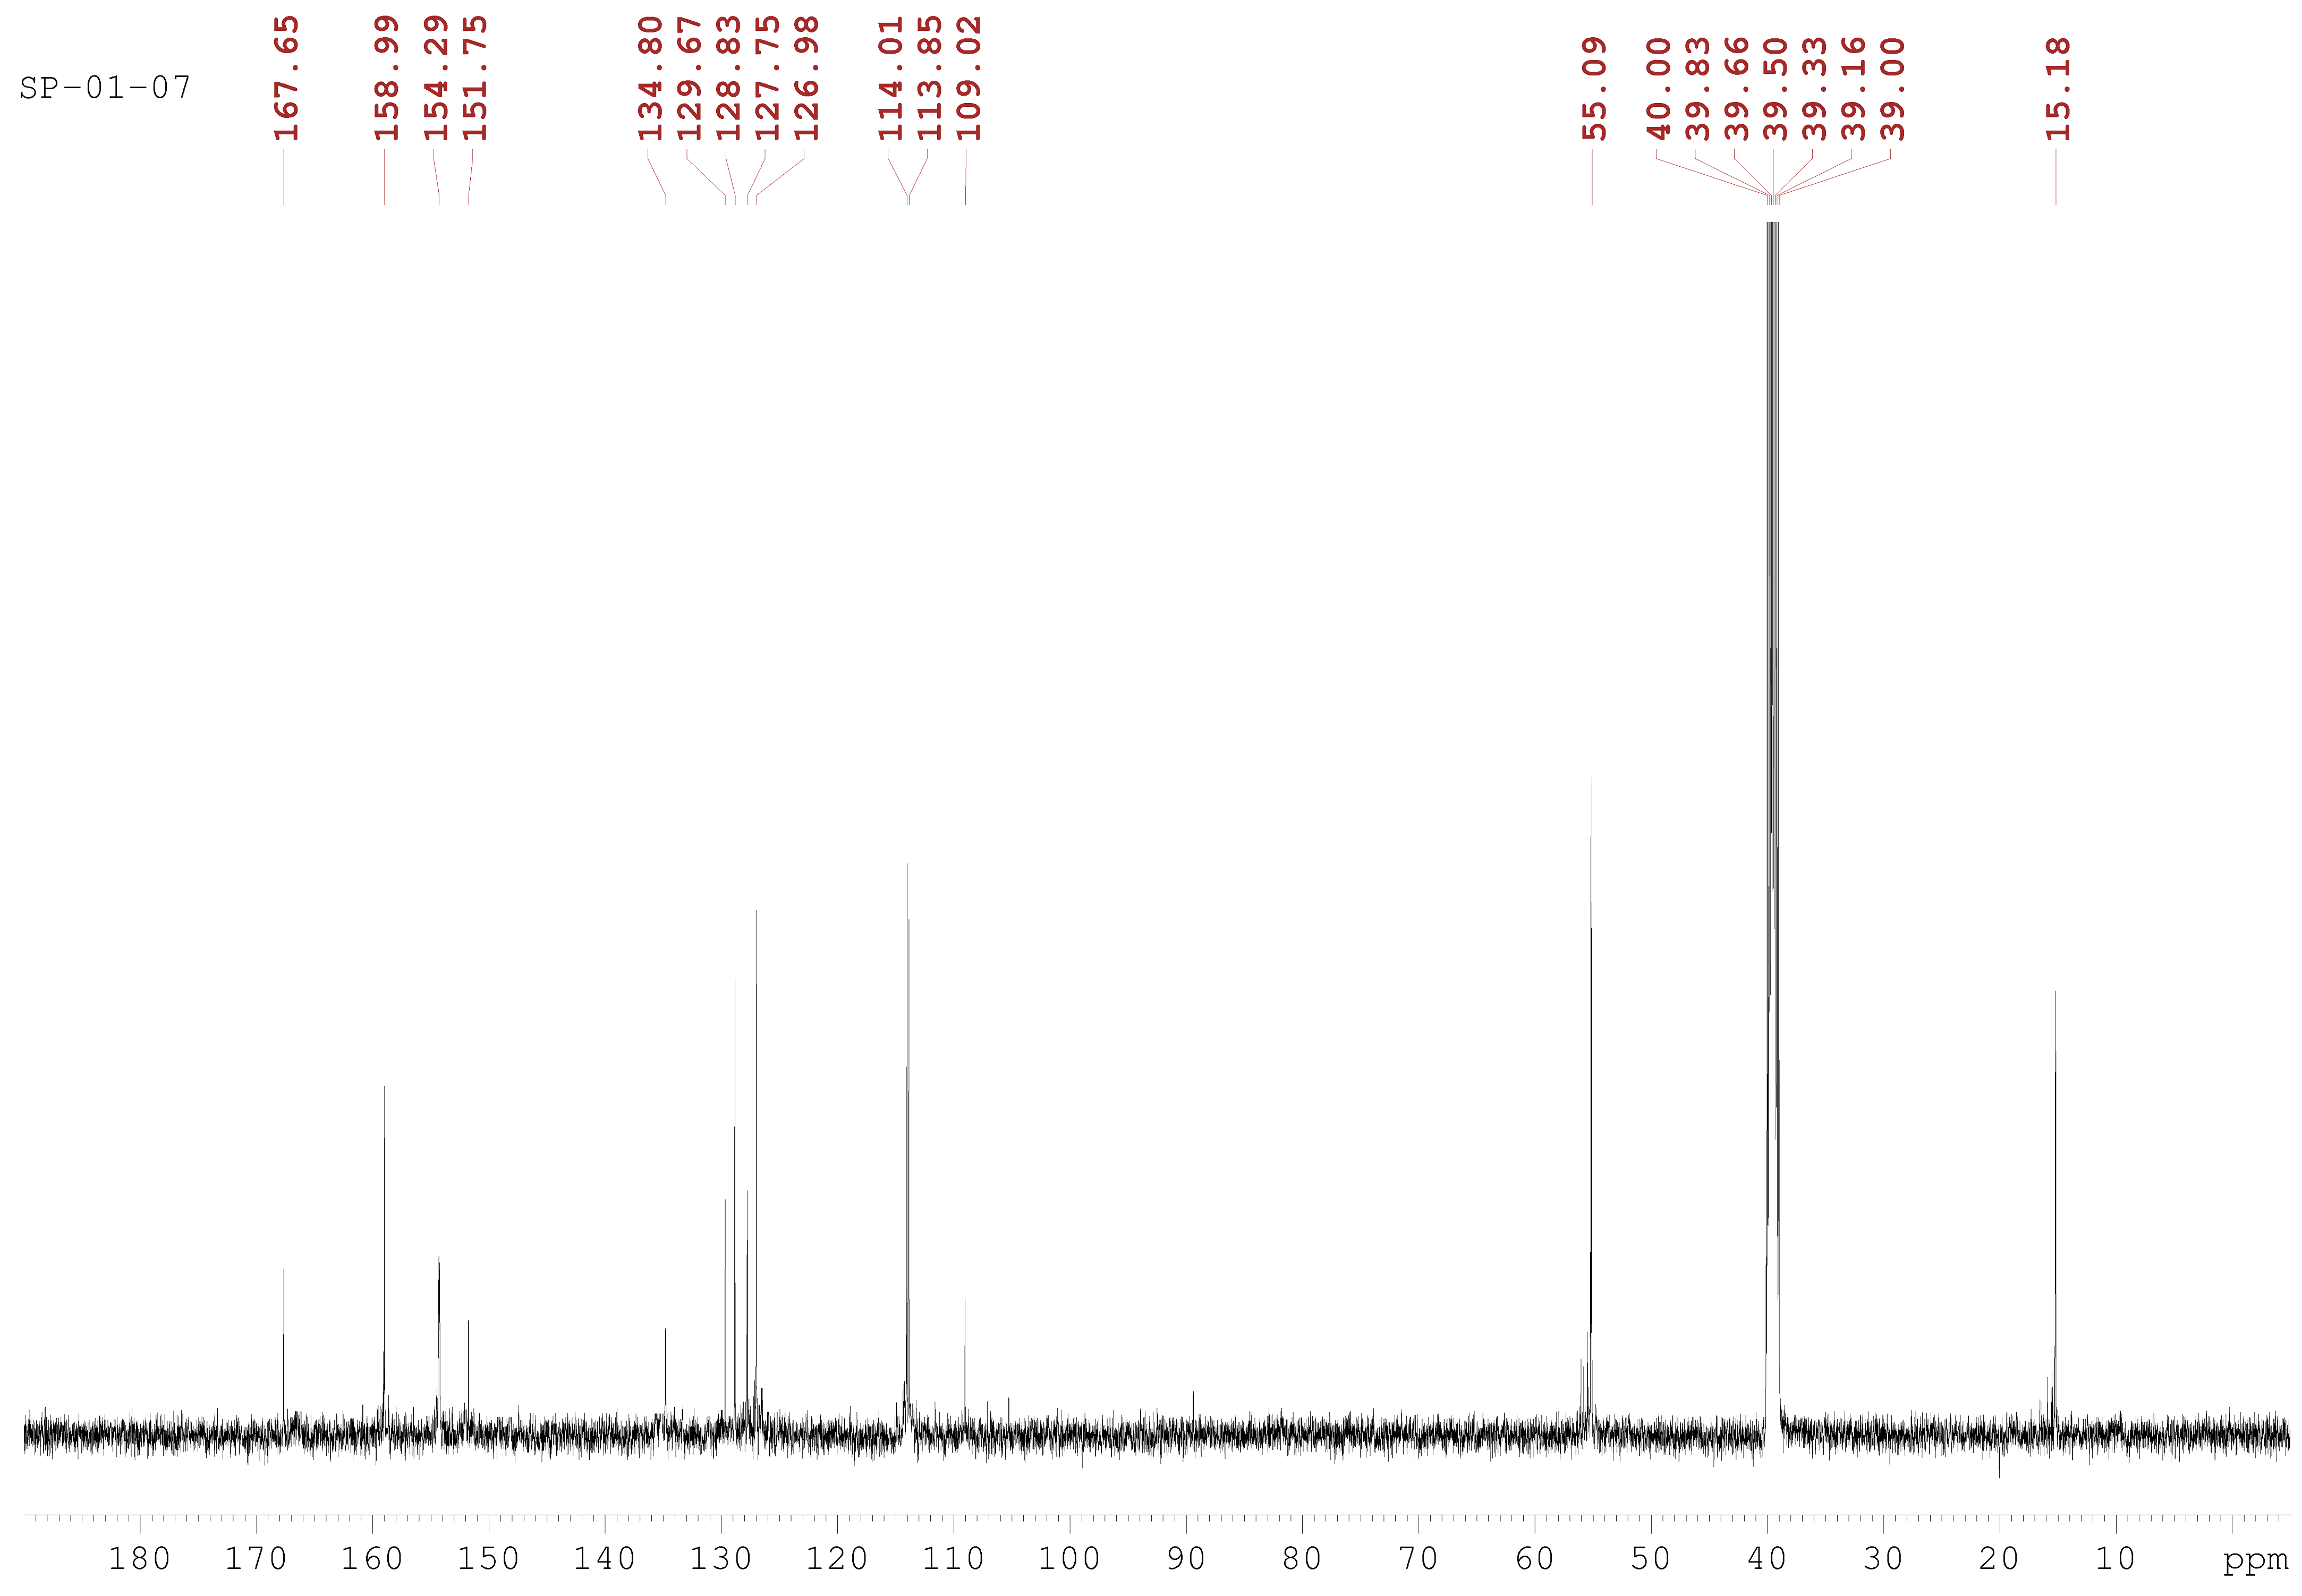 |

| **Compound 4g** (IR) |
| --- |
|  |

| **Compound 4g** (HRMS) |
| --- |
| 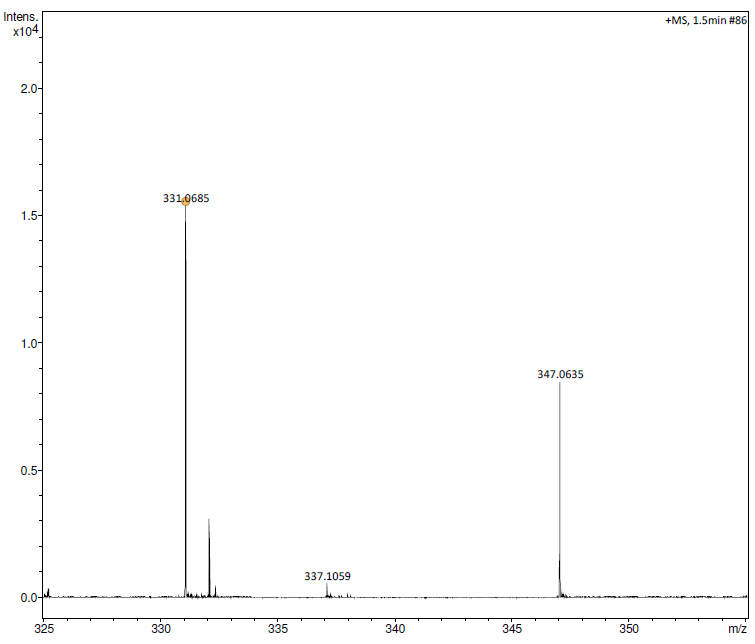 |
| **Compound 4h** (1H NMR, DMSO-*d6*, 500 MHz) |
|  |

| **Compound 4h** (13C NMR, DMSO-*d6*, 125 MHz) |
| --- |
| 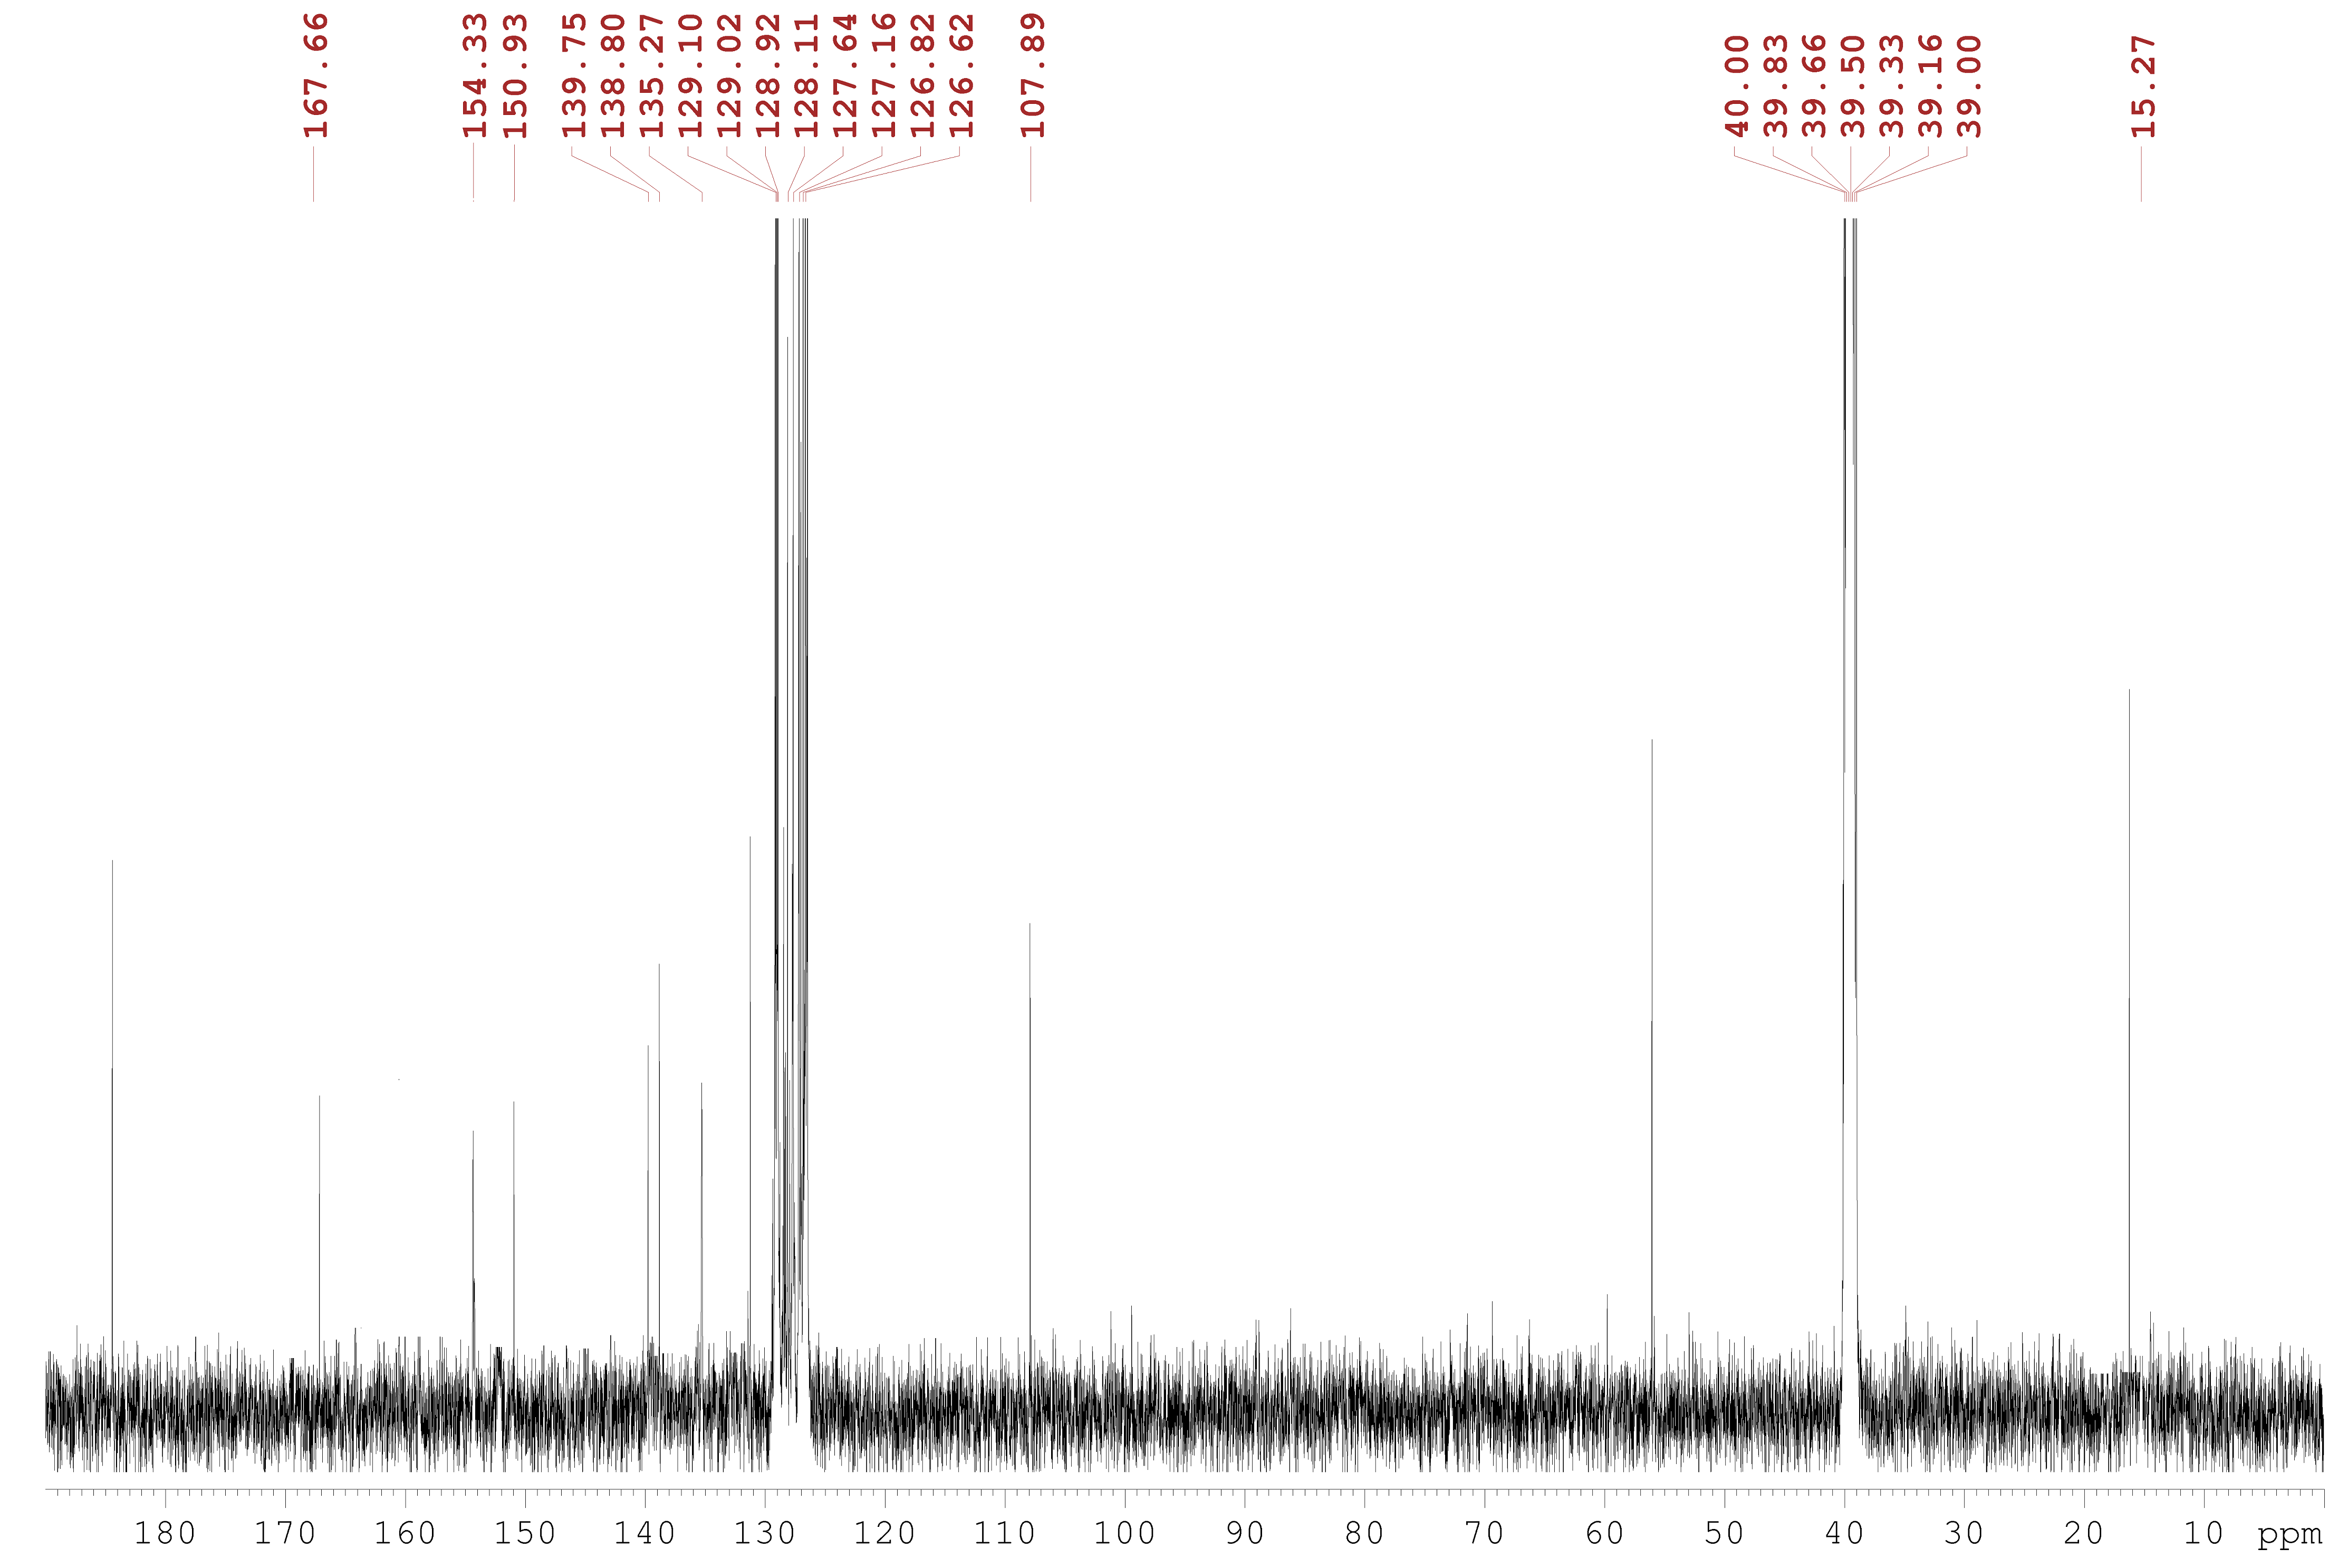 |

| **Compound 4h** (IR) |
| --- |
|  |

| **Compound 4h** (HRMS) |
| --- |
| 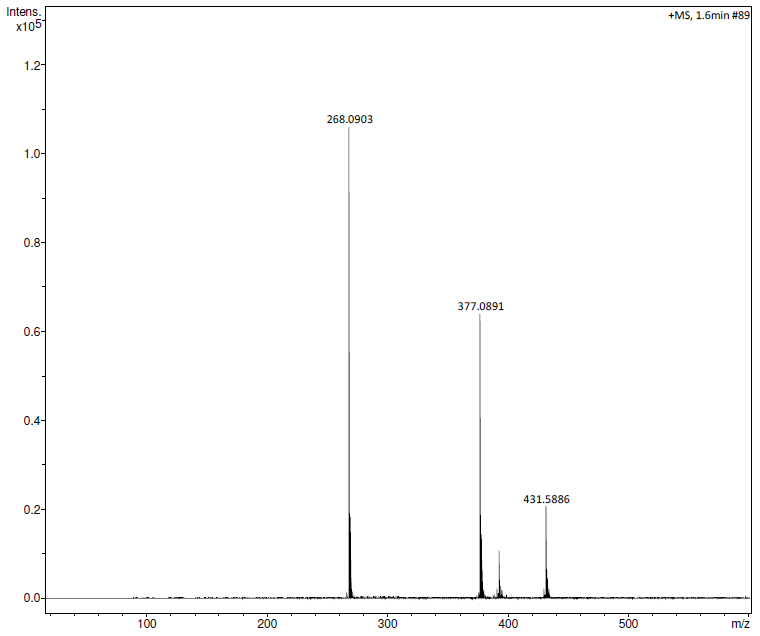 |
